# Supplementary material
Source: PubMed Central journal article supplement (PMC4249764)
Supplement: NIHMS645202-supplement-Supporting_Information.pdf [file NIHMS645202-supplement-Supporting_Information.pdf]

# **Online SERS Detection of the 20 Proteinogenic L-Amino Acids**

## **Separated by Capillary Zone Electrophoresis**

### **Supporting Information**

Pierre Negri and Zachary D. Schultz\*

Department of Chemistry and Biochemistry, University of Notre Dame, Notre Dame, IN 46556

#### **Abstract**

This supplement contains additional experimental methods regarding the SERS substrate nanofabrication, details on the CZE-SERS setup used for the experiments, Figure S-1 and S-2, as well as Table S-1, S-2, S-3, S-4, S-5, and S-6. Figure S-1 shows a diagram of the experimental CZE-SERS setup. Figure S-2 shows the averaged SERS spectra extracted from the SERS electropherogram of the twenty proteinogenic amino acids. Tables summarizing the observed vibrational bands with assignments in the SERS spectra of six groups of structurally-related amino acids are provided in Table S-1, S-2, S-3, S-4, S-5, and S-6. They include the aromatic side chain amino acids (Table S-1), the acidic and amide side chain amino acids (Table S-2), the basic side chain amino acids (Table S-3), the sulfur side chain amino acids (Table S-4), the aliphatic side chain amino acids (Table S-5), and the alcoholic side chain amino acids (Table S-6).

## Experimental Methods

Substrate Fabrication. Silver was vapor deposited onto the anodized aluminum oxide filter at a constant rate of 1.0-1.5 Å/s until a quartz crystal microbalance (QCM) registered a final nominal thickness of 500 nm. Prior to deposition, the Anodisc filters were cleaned for 5 minutes in an Ar<sup>+</sup> plasma (Model PDC-32G, Harrick Plasma, Ithaca, NY) to remove any surface contamination. Following deposition, the substrates were allowed to cool to room temperature under vacuum inside the deposition chamber for half an hour. The deposited metal films were then removed from the deposition chamber and stored in a vacuum desiccator to prevent oxidation and surface contamination.

CZE-SERS Setup. The homebuilt flow cell consists of a FEP plastic base plate, a SERS substrate, and a 250 µm thick silicone gasket with a 2 mm slit to define the flow channel, as well as a stainless steel top plate as shown in Figure S-1. The end of a 50 cm bare fused silica capillary (Polymicro Technologies, Phoenix, AZ) with 72 µm i.d., 143 µm o.d. was tightly clamped in between the gasket and the substrate to deliver the sample into the detection region. The capillary dimensions were chosen so that the ratio of the o.d. to i.d. is as close to one as possible. Under these conditions, the distance between the molecules eluting from the capillary and the SERS-active substrate is minimized, which increases detection sensitivity.<sup>1</sup> The sample injection was pressure driven through the capillary at a flow rate of 1 µL/min using a custom-made injection block.<sup>2</sup> Hydrodynamic focusing of the sample stream inside the flow chamber was achieved by pumping the sheath liquid (15 mM sodium tetraborate buffer, pH 9.4) continuously at a flow rate of 10 µL/min through the flow chamber via the inlet port located on the base plate. The sheath liquid flow rate was controlled using a syringe pump (Model NE-500 OEM, New Era Pump Systems Inc., Farmingdale, NY) controlled by LabView (National Instruments, Austin, TX). The

liquid was drained out of the flow chamber via the outlet channel connected to the waste reservoir. The flow channel was sealed with a standard cover glass, pressed by the top plate, and secured using 4 tensioning screws. The system was grounded directly from the SERS substrate during the CZE separations.

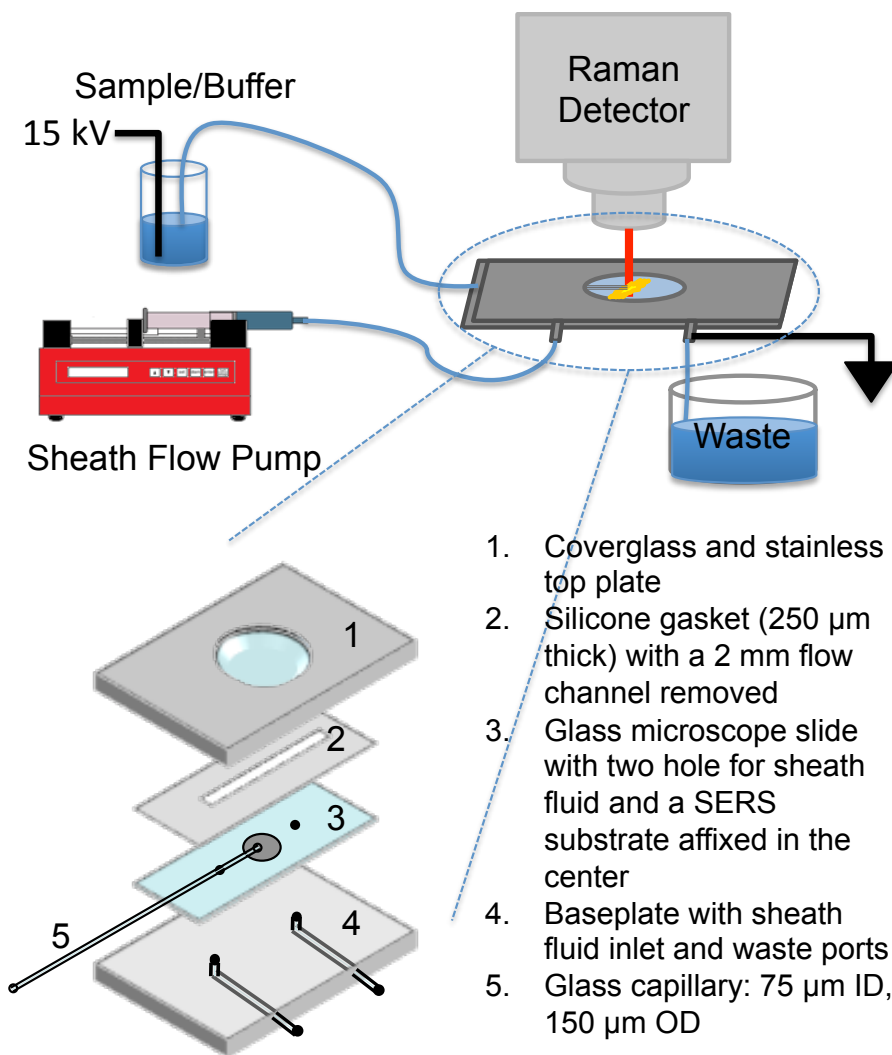

**Figure S-1.** The instrument layout is shown, illustrating how the sheath-flow SERS detector is incorporated into a capillary electrophoresis experiment. The components of the detector (blow-up) are numbered and described.

**Table S-1.** Observed vibrational bands with assignments in the SERS spectra of the aromatic side chain amino acids (Trp, Phe, and Tyr). Bands allowing discrimination and identification of the amino acids are highlighted in red.

| Peak Position (cm <sup>-1</sup> ) |      |      | Proposed Band Assignment                  |
|-----------------------------------|------|------|-------------------------------------------|
| Trp                               | Phe  | Tyr  |                                           |
| 677                               |      |      | Ring C-H deformation                      |
|                                   | 813  |      | CH <sub>2</sub> rocking                   |
| 1004                              |      | 1004 | Symmetric ring C-C stretching             |
| 1134                              | 1142 |      | NH <sub>3</sub> <sup>+</sup> rocking      |
| 1165                              |      |      | Ring C-H bending                          |
|                                   |      | 1193 | C <sub>β</sub> -C <sub>γ</sub> stretching |
|                                   | 1244 |      | Ring stretching                           |
| 1272                              | 1272 | 1272 | CH <sub>2</sub> wagging                   |
| 1356                              |      |      | Pyrrole ring stretching                   |
| 1463                              |      | 1463 | CH <sub>2</sub> scissoring                |
|                                   | 1516 |      | NH <sub>3</sub> <sup>+</sup> deformation  |
| 1552                              | 1564 | 1564 | Ring stretching                           |

**Table S-2.** Observed vibrational bands with assignments in the SERS spectra of the acidic and amide side chain amino acids (Gln, Asn, Glu, and Asp). Bands allowing discrimination and identification of the amino acids are highlighted in red.

| Peak Position (cm <sup>-1</sup> ) |      |      |      | Proposed Band Assignment                 |
|-----------------------------------|------|------|------|------------------------------------------|
| Gln                               | Asn  | Glu  | Asp  |                                          |
|                                   |      | 692  | 692  | COO <sup>-</sup> deformation             |
|                                   |      | 755  | 755  | NH <sub>3</sub> <sup>+</sup> deformation |
|                                   |      | 795  | 795  | COO <sup>-</sup> bending                 |
|                                   |      | 893  | 893  | C-C stretching                           |
| 1123                              | 1123 |      |      | NH <sub>2</sub> rocking                  |
|                                   |      | 1151 | 1151 | NH <sub>3</sub> <sup>+</sup> deformation |
|                                   |      | 1182 | 1182 | C-H bending                              |
| 1248                              | 1248 |      |      | CH <sub>2</sub> bending                  |
| 1346                              | 1346 | 1346 |      | C-H bending                              |
| 1407                              | 1407 |      |      | COO <sup>-</sup> symmetric stretching    |
|                                   |      | 1437 | 1437 | CH <sub>2</sub> scissoring               |
| 1465                              | 1465 | 1473 | 1473 | CH <sub>2</sub> scissoring               |
| 1575                              | 1575 |      |      | COO <sup>-</sup> deformation             |

**Table S-3.** Observed vibrational bands with assignments in the SERS spectra of the basic side chain amino acids (Arg, Lys, and His). Bands allowing discrimination and identification of the amino acids are highlighted in red.

| Peak Position (cm <sup>-1</sup> ) |      |      | Proposed Band Assignment                             |
|-----------------------------------|------|------|------------------------------------------------------|
| Arg                               | Lys  | His  |                                                      |
|                                   |      | 1123 | NH <sub>3</sub> <sup>+</sup> rocking                 |
| 1151                              | 1155 |      | N-H wagging                                          |
| 1175                              |      |      | NH <sub>3</sub> <sup>+</sup> deformation             |
| 1282                              | 1244 |      | CH <sub>2</sub> wagging                              |
|                                   |      | 1306 | CH <sub>2</sub> wagging                              |
|                                   |      | 1349 | C-H bending                                          |
| 1417                              |      | 1410 | COO <sup>-</sup> symmetric stretching                |
|                                   |      | 1463 | CH <sub>2</sub> scissoring                           |
|                                   |      | 1482 | Ring stretching + C <sub>1</sub> -H in-plane bending |
|                                   | 1486 |      | CH <sub>2</sub> wagging                              |
| 1523                              | 1536 |      | NH <sub>3</sub> <sup>+</sup> deformation             |
| 1564                              | 1569 | 1564 | COO <sup>-</sup> anti-symmetric stretching           |

**Table S-4.** Observed vibrational bands with assignments in the SERS spectra of the sulfur-containing side chain amino acids (Met and Cys). Bands allowing discrimination and identification of the amino acids are highlighted in red.

| Peak Position (cm <sup>-1</sup> ) |      | Proposed Band Assignment                 |
|-----------------------------------|------|------------------------------------------|
| Met                               | Cys  |                                          |
| 673                               | 673  | C-S stretching                           |
|                                   | 875  | C-C stretching                           |
| 995                               |      | C-C stretching                           |
| 1155                              | 1155 | NH <sub>3</sub> <sup>+</sup> deformation |
| 1244                              | 1244 | CH <sub>2</sub> wagging                  |
|                                   | 1349 | C-H bending                              |
| 1443                              |      | CH <sub>2</sub> scissoring               |
|                                   | 1496 | CH <sub>2</sub> scissoring               |
| 1539                              |      | NH <sub>3</sub> <sup>+</sup> deformation |

**Table S-5.** Observed vibrational bands with assignments in the SERS spectra of the aliphatic side chain amino acids (Leu, Ile, Val, Pro, Ala, and Gly). Bands allowing discrimination and identification of the amino acids are highlighted in red.

| Leu  | Ile  | Val  | Pro  | Ala  | Gly  |                                          |
|------|------|------|------|------|------|------------------------------------------|
|      |      |      |      | 692  |      | NH <sub>3</sub> <sup>+</sup> wagging     |
|      |      |      |      | 989  |      | C-C stretching                           |
| 1112 | 1108 |      |      | 1106 |      | C-H deformation                          |
| 1148 |      |      | 1152 |      | 1130 | NH <sub>3</sub> <sup>+</sup> deformation |
|      | 1186 |      |      |      | 1165 | NH <sub>3</sub> <sup>+</sup> deformation |
|      |      | 1227 | 1226 |      |      | C-N stretching                           |
| 1278 | 1274 |      |      |      |      | CH <sub>2</sub> wagging                  |
|      |      |      | 1366 |      |      | CH <sub>2</sub> scissoring               |
| 1413 | 1397 |      | 1393 |      |      | COO <sup>-</sup> symmetric stretching    |
|      |      |      | 1472 |      |      | CH <sub>2</sub> scissoring               |
| 1493 | 1493 | 1493 |      | 1490 |      | COO <sup>-</sup> symmetric stretching    |
| 1572 |      |      |      | 1564 | 1543 | C=O stretching                           |
| 1614 | 1624 | 1621 |      | 1614 |      | COO <sup>-</sup> symmetric stretching    |



**Table S-6.** Observed vibrational bands with assignments in the SERS spectra of the alcoholic side chain amino acids (Thr and Ser). Bands allowing discrimination and identification of the amino acids are highlighted in red.

| Peak Position (cm <sup>-1</sup> ) |      | Proposed Band Assignment                 |
|-----------------------------------|------|------------------------------------------|
| Thr                               | Ser  |                                          |
| 1151                              |      | NH <sub>3</sub> <sup>+</sup> deformation |
| 1184                              | 1179 | C-H bending                              |
|                                   | 1417 | COO <sup>-</sup> symmetric stretching    |
| 1456                              |      | CH <sub>3</sub> asymmetric bending       |
|                                   | 1496 | COO <sup>-</sup> symmetric stretching    |
| 1539                              |      | NH <sub>3</sub> <sup>+</sup> deformation |

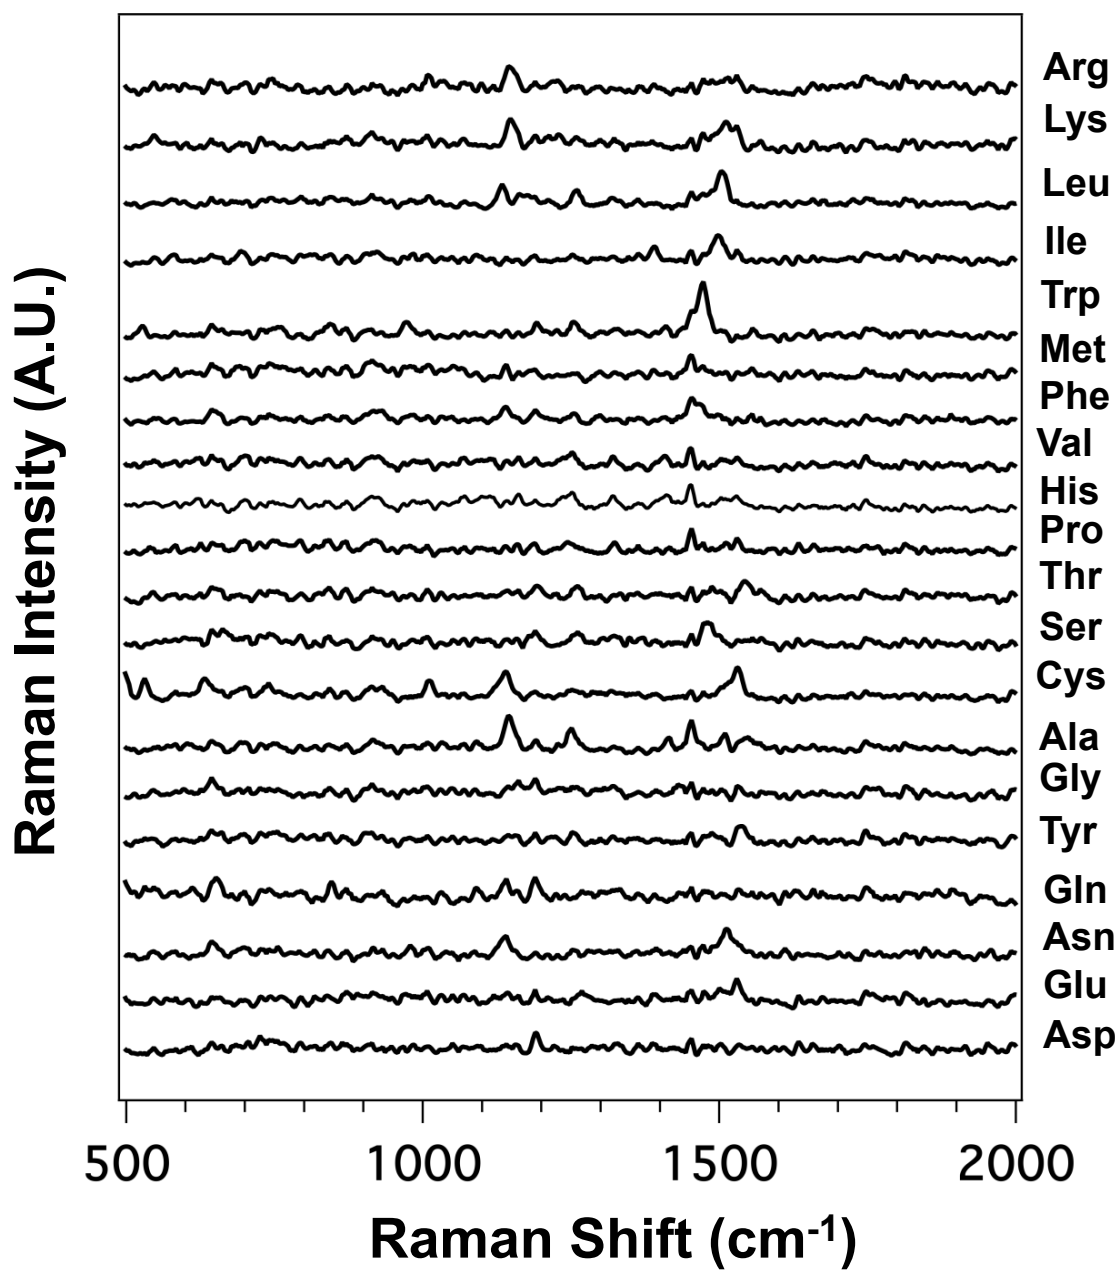

**Figure S-2:** Averaged SERS spectra of all twenty proteinogenic amino acids extracted from the heatmap shown in Figure 7A. The amino acids were assigned based on the spectral agreement observed in the text and listed in the tables above.

### Assignment of Migration Signals in 20 Amino Acid Separation.

Arginine, at  $t_m = 108.8$  s, exhibits bands at 1045 (C-H stretching), 1148 (N-H wagging), 1477 (CH<sub>2</sub> scissoring), and 1530 cm<sup>-1</sup> (NH<sub>3</sub><sup>+</sup> deformation).

Lysine, at  $t_m = 110.2$  s, shows the bands assigned to the wagging mode of the N-H group (1148 cm<sup>-1</sup>), the bending mode of the C-H group (1339 cm<sup>-1</sup>), the scissoring mode of the CH<sub>2</sub> group (1477 cm<sup>-1</sup>), the deformation of the NH<sub>3</sub><sup>+</sup> group (1528 cm<sup>-1</sup>), and the COO<sup>-</sup> anti-symmetric stretch of the carbonyl group (1569 cm<sup>-1</sup>).

Leucine and its structural isomer isoleucine closely elute at  $t_m = 112.1$  and  $t_m = 113.1$  s. Assignment is made based on bands attributed to stretching mode of the C-H group at 1042 cm<sup>-1</sup> and the stretching deformation of the COO<sup>-</sup> group at 1505 cm<sup>-1</sup>. As reported in the main text, the band assigned to the CH<sub>2</sub> wagging mode at 1265 cm<sup>-1</sup> is more intense in the SERS spectrum of leucine than that of isoleucine. Further differentiation between the isomers was made by the deformation mode of the NH<sub>3</sub><sup>+</sup> at 1158 cm<sup>-1</sup> group of leucine; whereas the spectrum of isoleucine displays the deformation mode of the NH<sub>3</sub><sup>+</sup> group at 1189 cm<sup>-1</sup>.

Tryptophan migrates at  $t_m = 116.9$  s. The main features shown in Figure 7 allowing identification of tryptophan are the bands attributed to the methylene vibrations at 1258 (CH<sub>2</sub> wagging) and 1458 cm<sup>-1</sup> (CH<sub>2</sub> scissoring). The aromatic contributions present in the SERS spectrum of tryptophan are the two bands at 1178 (ring C-H bending) and 1565 cm<sup>-1</sup> (ring stretching). The only feature present in the SERS spectrum shown in Figure 7 attributed to the pyrrole ring is the symmetric indole N-H stretching at 1616 cm<sup>-1</sup>.

Methionine migrates at  $t_m = 119.7$  s and is easily identifiable by the band at 669 cm<sup>-1</sup> attributed to the C-S stretching motion. The other features present in the spectrum of methionine

shown in Figure 7 are the bands at 1053 (C-H stretching), 1142 ( $\text{NH}_3^+$  rocking), and 1448  $\text{cm}^{-1}$  ( $\text{CH}_2$  scissoring), as reported in the text.

Phenylalanine is detected at  $t_m = 121.0$  s by the features attributed to the aromatic constituents of phenylalanine, more specifically, the bands at 642 (skeletal ring stretching), 1193 ( $\text{C}_\beta\text{-C}_\gamma$  stretching), 1238 (ring stretching), and 1558  $\text{cm}^{-1}$  (ring stretching). The other prominent features present in the spectrum of phenylalanine are the bands at 1137 ( $\text{NH}_3^+$  rocking) and 1442  $\text{cm}^{-1}$  ( $\text{CH}_2$  scissoring).

Valine is observed at  $t_m = 124.3$  s. The spectrum is characterized by the C-N stretching mode at 1236  $\text{cm}^{-1}$  and the symmetric stretch of the  $\text{COO}^-$  group at 1488  $\text{cm}^{-1}$ , as reported in the article. Again, the absence of bands attributed to methylene vibrations provides further evidence for the identification of valine.

Histidine migrates at  $t_m = 126.7$  s and is readily identified by the bands attributed to the imidazole ring deformation (1194  $\text{cm}^{-1}$ ), the  $\text{CH}_2$  bending (1248  $\text{cm}^{-1}$ ) and scissoring (1458  $\text{cm}^{-1}$ ) modes, as well as the symmetric stretch of the  $\text{COO}^-$  group (1413  $\text{cm}^{-1}$ ).

Proline is observed at 127.6 s. The features allowing identification of threonine are the deformation of the  $\text{NH}_3^+$  group at 1189  $\text{cm}^{-1}$  and the C-N stretching motion of the  $\alpha$  carbon at 1226  $\text{cm}^{-1}$ . In addition, modes of the methylene groups in the cyclic hydrocarbon chain of proline were observed at 1363 ( $\text{CH}_2$  wagging) and 1462  $\text{cm}^{-1}$  ( $\text{CH}_2$  scissoring).

Threonine and serine are detected at  $t_m = 129.1$  and  $t_m = 131.5$  s. In addition to common spectral bands (deformation of the  $\text{NH}_3^+$  group at 1189 and 1548  $\text{cm}^{-1}$ ), the features that distinguish threonine are the bands attributed to the C-N stretching mode at 1265  $\text{cm}^{-1}$  and the

band at  $1450\text{ cm}^{-1}$  assigned to the  $\text{CH}_3$  symmetric bend in threonine, while serine is identified by the band at  $1275\text{ cm}^{-1}$  attributed to the methyl group ( $\text{CH}_2$  wagging).

Cysteine is observed at  $t_m = 132.2\text{ s}$  and is easily identifiable by the characteristic C-S stretching mode at  $673\text{ cm}^{-1}$ . Other features allowing identification of cysteine include the C-H stretching mode at  $1041\text{ cm}^{-1}$ , the deformation of the  $\text{NH}_3^+$  group at  $1141\text{ cm}^{-1}$ , and the  $\text{CH}_2$  scissoring mode at  $1496\text{ cm}^{-1}$ , in agreement with the spectrum of cysteine reported in the text.

The SERS spectrum of alanine is detected at  $t_m = 134.8$  by bands characteristic of the carboxyl and amine group, as well as a distinct contribution from the aliphatic side chain. Contributions of the amine group are observed at  $1250$  (C-N bending mode) and  $1144\text{ cm}^{-1}$  (deformation of the  $\text{NH}_3^+$  group), while the asymmetric  $\text{CH}_3$  deformation mode at  $1453\text{ cm}^{-1}$  is attributed to the aliphatic side chain of alanine.

Glycine is observed at  $t_m = 136.5\text{ s}$  and identified by the bands assigned to the  $\text{NH}_3^+$  wagging ( $662\text{ cm}^{-1}$ ) and deformation ( $1165$  and  $1543\text{ cm}^{-1}$ ) modes of the amine group. The feature allowing identification of glycine is the band  $1112\text{ cm}^{-1}$  assigned to the C-H stretching modes of the aliphatic side chain, as reported in the text.

Tyrosine is observed at  $t_m = 176.2$ . The SERS spectrum of tyrosine is characterized by a low signal to noise (S/N) ratio. However, two features allow identification of tyrosine. The first is the band at  $1463\text{ cm}^{-1}$  attributed to the scissoring mode  $\text{CH}_2$ . The second is a ring stretching mode at  $1560\text{ cm}^{-1}$ , a feature intrinsic to the ring in tyrosine.

Glutamine ( $t_m = 180.7\text{ s}$ ) and asparagine ( $t_m = 194.6\text{ s}$ ) have similar SERS spectra. As reported above, these amino acids can be distinguished from the others amino acids by the bands attributed to the carboxiamide group intrinsic to these two amino acids. The amine bands

observed at 1132 ( $\text{NH}_3^+$  rocking) and 1516  $\text{cm}^{-1}$  ( $\text{NH}_3^+$  deformation), as well as the carboxyl band at 647  $\text{cm}^{-1}$  ( $\text{COO}^-$  wagging) indicate that both the amine and carboxyl groups are interacting with the surface. The band attributed to the scissoring mode of  $\text{CH}_2$  at 1465  $\text{cm}^{-1}$  is only observed in the SERS spectrum of glutamine, enabling differentiation of glutamine from asparagine.

Glutamic acid ( $t_m = 207.6$  s) and aspartic acid ( $t_m = 214.2$  s) are the last two amino acids to migrate off the capillary. The spectra share some common features, such as the  $\text{NH}_3^+$  deformation of the protonated amine terminus at 1151  $\text{cm}^{-1}$ , the C-H bending motion of the  $\alpha$  carbon at 1189  $\text{cm}^{-1}$  and the  $\text{CH}_2$  scissoring mode at 1440  $\text{cm}^{-1}$ . The distinct features allowing identification of the SERS spectrum of glutamic acid are the band at 1265  $\text{cm}^{-1}$  assigned to the  $\text{CH}_2$  bending mode of the methylene group and the band at 1529  $\text{cm}^{-1}$  attributed to the  $\text{NH}_3^+$  deformation. These bands are not observed for aspartic acid.

## References:

1. P. Negri, K. T. Jacobs, O. O. Dada and Z. D. Schultz, *Anal Chem*, 2013, 85, 10159-10166.
2. S. N. Krylov, D. A. Starke, E. A. Arriaga, Z. Zhang, N. W. Chan, M. M. Palcic and N. J. Dovichi, *Anal Chem*, 2000, 72, 872-877.
